# Supplementary material for: Trends in the sources and sinks of carbon dioxide
Source: Springer Nature journal article supplement (doi:10.1038/ngeo689), 2009-11-17
Supplement: 41561_2009_BFngeo689_MOESM235_ESM.pdf [file 41561_2009_BFngeo689_MOESM235_ESM.pdf]

## Trends in the sources and sinks of carbon dioxide

Corinne Le Quéré<sup>1,2</sup>, Michael R. Raupach<sup>3</sup>, Josep G. Canadell<sup>3</sup>, Gregg Marland<sup>4</sup>, Laurent Bopp<sup>5</sup>, Philippe Ciais<sup>5</sup>, Thomas J. Conway<sup>6</sup>, Scott C. Doney<sup>7</sup>, Richard A. Feely<sup>8</sup>, Pru Foster<sup>9</sup>, Pierre Friedlingstein<sup>5,9</sup>, Kevin Gurney<sup>10</sup>, Richard A. Houghton<sup>11</sup>, Johanna I. House<sup>9</sup>, Chris Huntingford<sup>12</sup>, Peter E. Levy<sup>13</sup>, Mark R. Lomas<sup>14</sup>, Joseph Majkut<sup>15</sup>, Nicolas Metzger<sup>16</sup>, Jean P. Ometto<sup>17</sup>, Glen P. Peters<sup>18</sup>, I. Colin Prentice<sup>9</sup>, James T. Randerson<sup>19</sup>, Steven W. Running<sup>20</sup>, Jorge L. Sarmiento<sup>14</sup>, Ute Schuster<sup>1</sup>, Stephen Sitch<sup>21</sup>, Taro Takahashi<sup>22</sup>, Nicolas Viovy<sup>5</sup>, Guido R. van der Werf<sup>23</sup>, F. Ian Woodward<sup>13</sup>

<sup>1</sup>School of Environment Sciences, University of East Anglia, Norwich, NR4 7TJ, UK;

<sup>2</sup>British Antarctic Survey, High Cross, Madingley Road, Cambridge BC3 0ET;

<sup>3</sup>Global Carbon Project, CSIRO Marine and Atmospheric Research, Canberra, ACT 2601, Australia;

<sup>4</sup>Carbon Dioxide Information Analysis Center, Oak Ridge National Laboratory, Oak Ridge, Tennessee 37831-6335, USA ;

<sup>5</sup>Laboratoire des Sciences du Climat et de l'Environnement, UMR 1572 CEA-CNRS-UVSQ, Gif sur Yvette, 91191;

<sup>6</sup>NOAA Earth System Research Laboratory, Boulder, Colorado 80305, USA;

<sup>7</sup>Woods Hole Oceanographic Institution, Clark 424, MS#25, Woods Hole, MA 02543, USA;

<sup>8</sup>Pacific Marine Environmental Laboratory, 7600 Sand Point Way NE, Seattle, WA 98115;

<sup>9</sup>Department of Earth Sciences, University of Bristol, Bristol, BS8 1RJ, UK;

<sup>10</sup>Dept of Earth and Atmospheric Sciences & Dept of Agronomy, Purdue Univ, IN 47907-2051, USA;

<sup>11</sup>Woods Hole Research Center, Falmouth, MA 02540, USA;

<sup>12</sup>Centre for Ecology and Hydrology, Wallingford, Benson Land, OX108BB, UK;

<sup>13</sup>Centre for Ecology and Hydrology, Bush Estate, Penicuik, Midlothian, EH26 0QB UK;

<sup>14</sup>Department Animal & Plant Sciences, University of Sheffield, S10 2TH, UK

<sup>15</sup>AOS Program, Princeton University, P.O. Box CV710, Princeton, USA;

<sup>16</sup>LOCEAN-IPSL, CNRS, Institut Pierre Simon Laplace, Université P. et M. Curie - Case 100, 4, place Jussieu - 75252 Paris Cedex 5, France;

<sup>17</sup>Instituto Nacional de Pesquisas Espaciais (INPE), Av. dos Astronautas, 1758, 12227-010, São José dos Campos, SP, Brazil ;

<sup>18</sup>Center for International Climate and Environmental Research – Oslo, Pb. 1129 Blindern, N-0318 Oslo, Norway;

<sup>19</sup>Department of Earth System Science, University of California, Irvine, CA 92697, USA;

<sup>20</sup>School of Forestry/Numerical Terradynamic Simulation Group, University of Montana, Missoula MT 59812, USA;

<sup>21</sup>School of Geography, University of Leeds, Leeds, LS2 9JT, UK;

<sup>22</sup>Lamont-Doherty Earth Observatory of Columbia University, 61 Route 9W - PO Box 1000, Palisades, NY 10964-8000, USA;

<sup>23</sup>Faculty of Earth and Life Sciences, VU University, Amsterdam, Netherlands.

**Supplementary information**

**1. Global CO<sub>2</sub> budget**

The global CO<sub>2</sub> budget presented in this report can be found on the web site of the Global Carbon Project at: <http://www.globalcarbonproject.org>

Table S1. Summary of CO<sub>2</sub> sources and sinks and their partitioning for all decades since 1960 and for 2008 separately. The uncertainties associated with the various terms are detailed in the Method section of the main text.

|                                        | 1960-<br>1970 | 1970-<br>1980 | 1980-<br>1990 | 1990-<br>2000    | 2000-<br>2008 | 2008      |
|----------------------------------------|---------------|---------------|---------------|------------------|---------------|-----------|
| <i>Sources Pg C year<sup>-1</sup></i>  |               |               |               |                  |               |           |
| fossil fuel + cement                   | 3.1±0.2       | 4.7±0.3       | 5.5±0.3       | 6.4±0.4          | 7.7±0.4       | 8.7±0.5   |
| land use <sup>a</sup>                  | 1.5±0.7       | 1.3±0.7       | 1.5±0.7       | 1.6±0.7          | 1.4±0.7       | 1.2±0.7   |
| <i>Sinks Pg C year<sup>-1</sup></i>    |               |               |               |                  |               |           |
| atmospheric growth                     | 1.8±0.1       | 2.7±0.1       | 3.4±0.1       | 3.1±0.1          | 4.1±0.1       | 3.9±0.1   |
| ocean sink                             | 1.5±0.4       | 1.7±0.4       | 2.0±0.4       | 2.2±0.4          | 2.3±0.4       | 2.3±0.4   |
| land sink <sup>b</sup>                 | 1.2±0.9       | 2.6±1.1       | 1.8±0.9       | 2.6±0.9          | 3.0±0.9       | 4.7±1.2   |
| residual <sup>b</sup>                  | 0.1±1.3       | -1.1±1.4      | -0.1±1.3      | 0.0 <sup>d</sup> | -0.3±1.3      | -1.1±1.5  |
| <i>Partitioning of total emissions</i> |               |               |               |                  |               |           |
| atmosphere                             | 0.39±0.07     | 0.45±0.06     | 0.48±0.05     | 0.40±0.04        | 0.45±0.04     | 0.39±0.04 |
| ocean                                  | 0.33±0.10     | 0.29±0.08     | 0.29±0.07     | 0.28±0.06        | 0.26±0.05     | 0.24±0.05 |
| land <sup>c</sup>                      | 0.28±0.12     | 0.26±0.10     | 0.23±0.09     | 0.32±0.07        | 0.29±0.06     | 0.37±0.06 |

<sup>a</sup>Including both the release from deforestation, and cultivation of cropland soils, and the uptake from vegetation regrowth following afforestation, abandonment of agriculture and recovery from logging.

<sup>b</sup>Including only the response to CO<sub>2</sub> increase and climate change. The residual is most likely attributed to unaccounted variability in the land models, with a small part due to uncertainties in LUC (see main text)

<sup>c</sup>Including both the land sink and the residual. The uncertainty is the quadratic sum of the uncertainty in atmosphere and ocean fraction.

<sup>d</sup>The ocean and land sink are corrected to agree with observations over 1990-2000, thus the residual is zero during this time period.

Table S2. References describing the land and ocean models used in this study.

| Reference                                                        | Model                 |
|------------------------------------------------------------------|-----------------------|
| <i>Ocean models</i>                                              |                       |
| Thomas et al. 2008 <sup>1</sup>                                  | BEC                   |
| Galbraith et al. 2009 <sup>2</sup>                               | BLING                 |
| Aumont and Bopp 2006 <sup>3</sup>                                | PISCES                |
| Le Quéré et al. 2007 <sup>4</sup>                                | PISCES-T              |
| <i>Land models</i>                                               |                       |
| Sitch et al. 2003 <sup>5</sup> ; Gerten et al. 2004 <sup>6</sup> | LPJ <sup>a</sup>      |
| Friend et al. 2007 <sup>7</sup> ; Levy et al. 2004 <sup>8</sup>  | HyLand <sup>a</sup>   |
| Krinner et al. 2005 <sup>9</sup>                                 | ORCHIDEE <sup>a</sup> |

Woodward et al. 1995<sup>10</sup>; Woodward and Lomas 2004<sup>11</sup>SDGVM<sup>a</sup>Cox et al. 2001<sup>12</sup>TRIFFID<sup>a</sup><sup>a</sup>Models also used and compared in Sitch et al. (2008)<sup>13</sup>.

## 2. Uncertainty in land use change (LUC) and its impact on airborne fraction trend

The LUC estimate used here is based on the Houghton (2003)<sup>14</sup> methodology. It is the only published time series of LUC that covers nearly the entire period of our CO<sub>2</sub> budget. This LUC estimate is based on deforestation rates from FAO (2005)<sup>15</sup> statistics. The values presented here are lower than Houghton (2003) due to revised deforestation rates. Other estimates of historical LUC have been based on the SAGE database<sup>16-20</sup> or the HYDE<sup>18-19,21</sup> database as assessed by Hurt et al. (2006)<sup>22</sup>. SAGE uses FAO crop conversion data<sup>15</sup> and did not include conversion of deforestation to pastureland, which accounts for about one third of the total LUC emissions in Houghton's analysis. Neither the HYDE nor SAGE database went beyond year 2000.

LUC estimates based on SAGE only<sup>17,20</sup> showed decreasing LUC between 1958 and 1992 (Figure S1). LUC estimates based on HYDE<sup>19</sup>, or a combination of SAGE with HYDE pasture<sup>18</sup> also showed decreasing LUC over the same time period, but of about half the magnitude. The LUC estimate based on FAO deforestation rates used in our study showed a small decrease in LUC from 1958 to 1980, but a small increase during the 1980s. The discrepancy between LUC estimates during the 1980s is well known, and not easy to resolve as trends in deforestation rates are uncertain<sup>23-27</sup>.

Other studies have estimated LUC for fixed time periods. Satellite studies provided independent estimates of LUC due to tropical deforestation only, but do not fully capture timber harvest and shifting cultivation. DeFries et al. (2002)<sup>28</sup> estimated LUC of 0.3-0.8 PgC y<sup>-1</sup> for the 1980s and 0.5-1.4 PgC y<sup>-1</sup> for the 1990s, but these did not include any legacy emissions due to deforestation that occurred before the 1980s. Achard et al. (2002)<sup>29</sup> estimated LUC of 0.43-0.96 PgC y<sup>-1</sup> in the 1990s using a proxy for legacy emissions over a 10 year period. Finally, Feanside (2000)<sup>30</sup> provided an estimate of committed deforestation for the tropics of 2.0 PgC y<sup>-1</sup> and for the globe of 2.4 PgC y<sup>-1</sup> based on FAO forest statistics and other data for 1981-1990. This later estimate is particularly high as it computes all the carbon that will be released due to a given LUC rather than the annual LUC flux. The time series estimates of LUC shown in Figure S1 are consistent with the LUC estimates based on these other independent studies.

The trend in the fraction of the total CO<sub>2</sub> emissions that remained in the atmosphere (the airborne fraction) was influenced by the uncertainty in LUC estimates. To assess the impact of different LUC estimates, we recalculated the trend in airborne fraction using alternative LUC estimates (Table S3). For all published estimates examined here, the trend in airborne fraction was larger than the one computed by the bookkeeping data. The probability that this trend was above the natural variability was above 0.9, even for a shorter time period. When the LUC estimates were extended to 2008 assuming constant LUC for the last 18 years, the trends remained positive and above the trend computed using the bookkeeping method. Thus we concluded that a positive trend in airborne fraction was likely (66% confidence interval), according to the terminology used by the Intergovernmental Panel on Climate Change. Our assessment considered the p value of 0.9 and the uncertainty in LUC estimates.

Table S3. Trend in airborne fraction calculated using different estimates for LUC.

| Reference                               | Model    | Input data        | end year | airborne trend (% y <sup>-1</sup> ) | p value <sup>a</sup> |
|-----------------------------------------|----------|-------------------|----------|-------------------------------------|----------------------|
| this study                              | Houghton | FAO deforestation | 2008     | 0.3                                 | 0.92                 |
| Van Minnen et al. (2009) <sup>19</sup>  | IMAGE2   | HYDE-default      | 2000     | 0.4                                 | 0.96                 |
| Van Minnen et al. (2009) <sup>19</sup>  | IMAGE2   | HYDE-pastures     | 2000     | 0.5                                 | 0.97                 |
| McGuire et al. (2001) <sup>17</sup>     | IBIS     | SAGE              | 1992     | 0.7                                 | 0.97                 |
| McGuire et al. (2001) <sup>17</sup>     | HRBM     | SAGE              | 1992     | 0.7                                 | 0.96                 |
| McGuire et al. (2001) <sup>17</sup>     | LPJ      | SAGE              | 1992     | 0.9                                 | 0.99                 |
| McGuire et al. (2001) <sup>17</sup>     | TEM      | SAGE              | 1992     | 0.6                                 | 0.94                 |
| Piao et al. (2009) <sup>20,b</sup>      | ORCHIDEE | SAGE              | 1992     | 0.7                                 | 0.97                 |
| Shevliakova et al. (2009) <sup>18</sup> | LM3V     | SAGE/HYDE         | 1990     | 1.0                                 | 0.999                |
| Shevliakova et al. (2009) <sup>18</sup> | LM3V     | HYDE              | 1990     | 1.0                                 | 0.999                |

<sup>a</sup>The p value is computed as described in the Methods of the main text and in Canadell et al. (2007)<sup>31</sup>.

<sup>b</sup>Estimate after 1992 is not based on historical data and was excluded from this analysis.

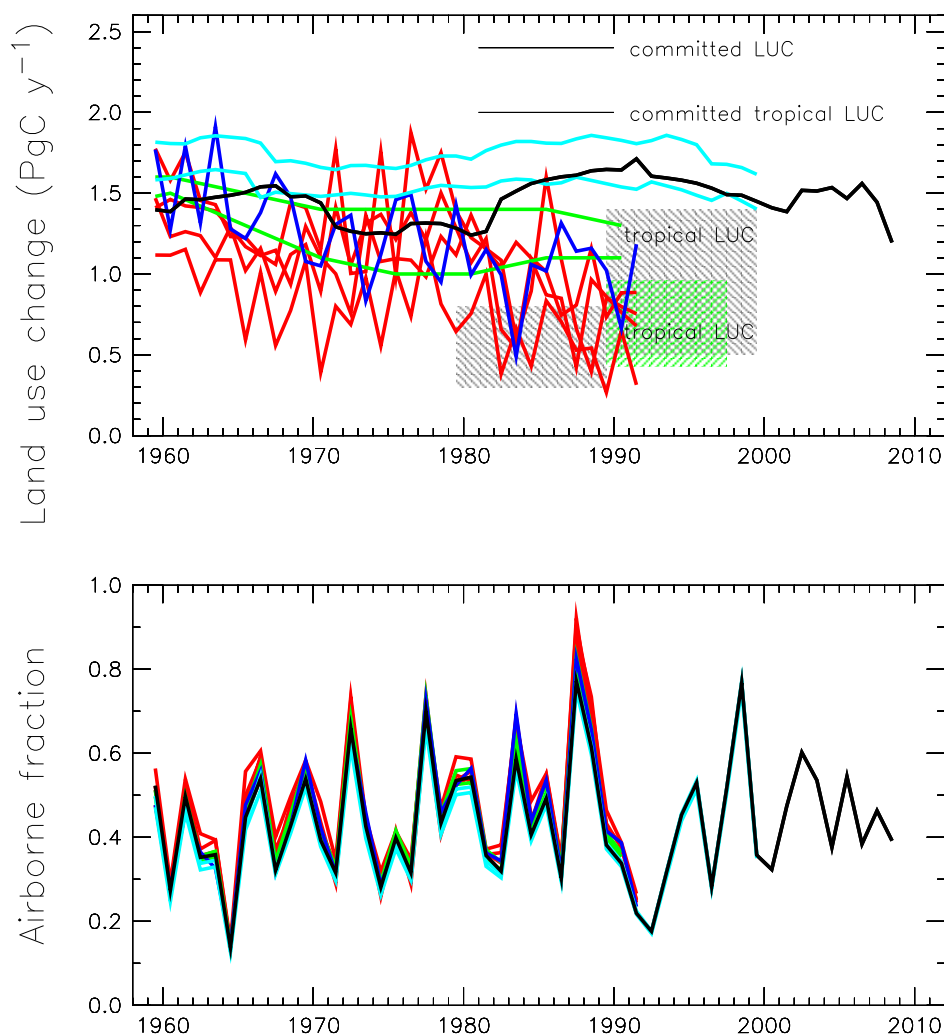

Figure S1. (top) LUC estimates from various sources: (black) this study, (red) four models published in McGuire et al. (2001)<sup>17</sup>, (green lines) two models published in Shevliakova et al. (2009)<sup>18</sup>, (cyan) two models published in Van Minnen et al. (2009)<sup>19</sup>, (blue) Piao et al. (2009)<sup>20</sup>. The gray and green boxes are estimates from DeFries et al. (2002)<sup>28</sup> and Archard et al. (2002)<sup>29</sup>, respectively. The committed LUC estimates are from Fearnside (2000)<sup>30</sup>. (Bottom) airborne fraction computed with the various LUC estimates from the top panel.

### 3. Processes driving the trend in airborne fraction according to models

We assessed the impact of climate variability and climate change on the airborne fraction using a sub-set of our land and ocean models. On land, we used the LPJ, ORCHIDEE, SDGVM, and TRIFFID models (Table S2). In the ocean, we used the BEC, PISCES and PISCES-T models. The land models were forced by increasing CO<sub>2</sub> alone (no changes in climate). The ocean model PISCES-T was also forced by increasing CO<sub>2</sub> alone, whereas PISCES and BEC were forced by changes in climate alone. For the later two models, the effect of increasing CO<sub>2</sub> alone was computed by subtracting the simulation forced by CO<sub>2</sub> and climate from the simulation forced by climate alone. The other model results were used directly.

The CO<sub>2</sub> sinks increased faster in all land and ocean simulations where the models were forced by atmospheric CO<sub>2</sub> alone compared to simulations where atmospheric CO<sub>2</sub> increased and climate changed, except in the SDGVM model which had similar land sink trends in both simulations. The model mean trends are shown in Figure S2. We computed the impact of these trends on the airborne fraction by reconstructing the atmospheric CO<sub>2</sub> based on the total CO<sub>2</sub> emissions minus our mean land and ocean CO<sub>2</sub> sinks. The resulting atmospheric CO<sub>2</sub> is shown in Figure S2(c). As expected, only the simulation where changes in climate are taken into account reproduced the variability in observed atmospheric CO<sub>2</sub>. The airborne fraction trend estimated when the models were forced by atmospheric CO<sub>2</sub> alone was  $-0.8\% \text{ y}^{-1}$ , and  $+0.1\% \text{ y}^{-1}$  when both atmospheric CO<sub>2</sub> increased and climate changed.

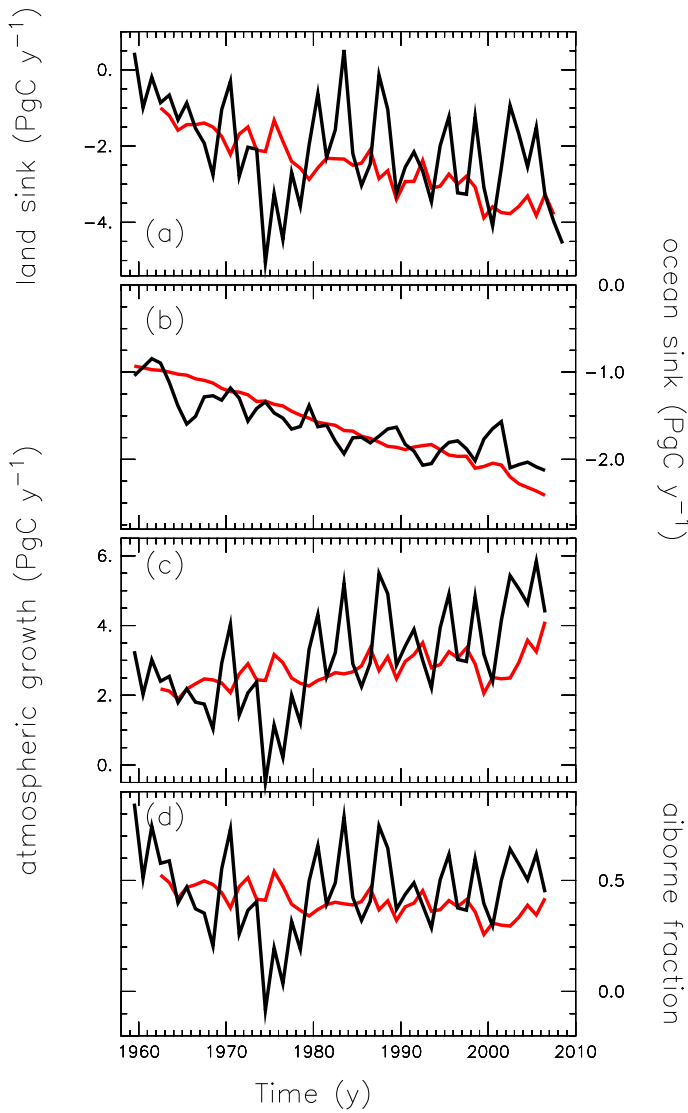

Figure S2. Components of the global CO<sub>2</sub> budget estimated with models forced by increasing CO<sub>2</sub> alone (red curves) and models forced by increasing CO<sub>2</sub> and changes in climate (black curves). Panels (a) and (b) show the land and ocean sinks (PgC y<sup>-1</sup>). In panel (c), we used the total emissions and subtracted the model estimates of the land and ocean sinks to construct the atmospheric CO<sub>2</sub> inferred by the combination of land and ocean models (PgC y<sup>-1</sup>). Panel (d) uses this model-based atmospheric CO<sub>2</sub> to compute the model-based airborne fraction (no units). The model average is shown on all plots.

Using existing model simulations, we tested the impact of different climatic forcing products on the oceanic CO<sub>2</sub> sinks (Figure S3). We isolated the impact of climate alone in simulations forced by NCEP reanalysis<sup>32</sup> (as in the main text), the most recent product of NCEP-2 reanalysis<sup>33</sup>, ECMWF reanalysis<sup>34</sup>, and wind estimates based on satellite data<sup>35-36</sup>. For all the forcing products tested, the effect of climate variability and climate change was always to reduce the oceanic CO<sub>2</sub> uptake after ~1995 compared to the earlier part of the record. The recent climate-induced trend simulated by the ocean models could be caused by decadal variability, particularly from the tropical Pacific ocean.

Finally, we estimated the impact of climate alone on the ocean CO<sub>2</sub> sink at both pre-industrial atmospheric CO<sub>2</sub> levels and at observed CO<sub>2</sub> levels using the BEC model. The impact of climate induced a trend in the CO<sub>2</sub> sink of 0.083 PgC y<sup>-1</sup> per decade at contemporary CO<sub>2</sub> levels, and 0.071 PgC y<sup>-1</sup> per decade at pre-industrial CO<sub>2</sub> levels. Thus the loss of buffering capacity in the ocean because of elevated CO<sub>2</sub> led to a larger impact of climate variability and climate change by 15%. This is consistent with the calculation of the increase in Revelle factor of 7% between pre-industrial levels and 1994 of Sabine et al. (2004)<sup>37</sup>.

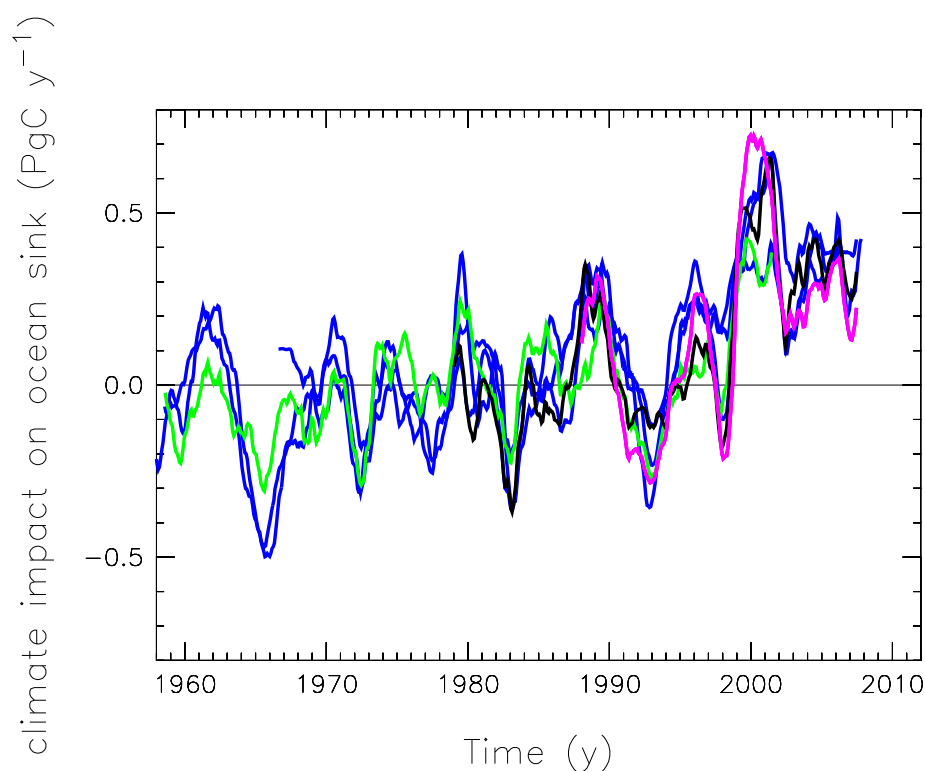

Figure S3. Impact of changes in climate on the ocean sink estimated by ocean models forced by different products (PgC y<sup>-1</sup>, positive = outgas). The blue curves show results from PISCES-T, PISCES, and BEC forced by NCEP re-analysis. The green curve shows results from PISCES forced by ECMWF reanalysis<sup>ref</sup>. The black curve shows results from PISCES-T forced by NCEP-2 reanalysis<sup>ref</sup>. Finally the purple curve shows results from PISCES-T forced by winds estimated from satellite data<sup>ref</sup>. The 1970-1995 average is removed from all time series to better highlight the trends.

4. Comparison with atmospheric inverse models

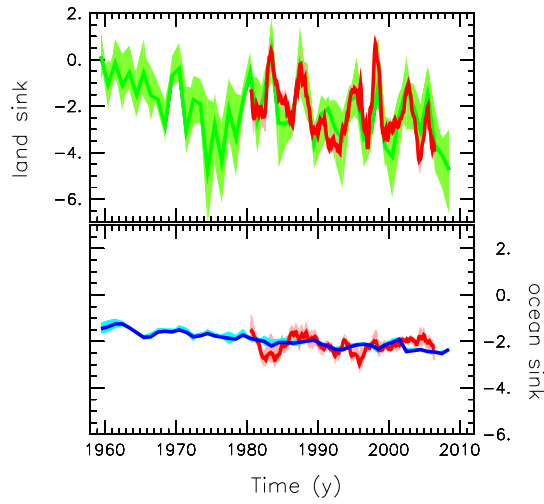

Figure S4. comparison of the land and ocean CO<sub>2</sub> sinks with estimates shown in Figure 2 with estimates from atmospheric inversion methods (red lines)<sup>38</sup>. The net land use estimates shown in Figure 2 (b) is removed from the atmospheric inversion results.



**References:**

1. Thomas H. *et al.* Changes in the North Atlantic Oscillation influence CO<sub>2</sub> uptake in the North Atlantic over the past 2 decades. *Global Biogeochem. Cy.* **22**, GB4027 (2008).
2. Galbraith, E. D., A. Gnanadesikan, J. P. Dunne, and M. R. Hiscock. Regional impacts of iron-light colimitation in a global biogeochemical model. *Biogeosciences Discussions*, 7517-7564, SRef-ID: 1810-6285/bgd/2009-6-7517 (2009).
3. Aumont, O. and L. Bopp. Globalizing results from ocean in situ iron fertilization studies. *Global Biogeochem. Cy.* **20**, GB2017 (2006).
4. Le Quéré *et al.* Saturation of the Southern Ocean CO<sub>2</sub> sink due to recent climate change. *Science* **316**, 1735-1738 (2007).
5. Sitch S., Smith B., Prentice I.C. *et al.* Evaluation of ecosystem dynamics, plant geography and terrestrial carbon cycling in the LPJ dynamic vegetation model. *Global Change Biology*, **9**, 161-185 (2003).
6. Gerten, D., Schaphoff, S., Haberlandt, U., Lucht, W., and Sitch, S. Terrestrial vegetation and water balance - hydrological evaluation of a dynamic global vegetation model. *Journal of Hydrology*, **286**, 249-270 (2004).
7. Friend, A.D., Stevens A.K., Knox, R.G., Cannell, M.G.R. A process-based, terrestrial biosphere model of ecosystem dynamics (Hybrid v3.0). *Ecological Modelling*, **95**, 249-287 (1997).
8. Levy, P.E., Cannell, M.G.R., Friend, A.D. Modelling the impact of future changes in climate, CO<sub>2</sub> concentration and land use on natural ecosystems and the terrestrial carbon sink. *Global Environmental Change*, **14**, 21-30 (2004).
9. Krinner, G., Viovy, N., de Noblet-Ducoudré, N, *et al.* A dynamic global vegetation model for studies of the coupled atmosphere-biosphere system. *Global Biogeochemical Cycles*, **19**, GB1015, doi: 10.1029/2003GB002199 (2005).
10. Woodward, F.I., Smith, T.M., Emanuel, W.R. A global land primary productivity and phytogeography model. *Global Biogeochemical Cycles*, **9**, 471-490 (1995).
11. Woodward, F.I., Lomas, M.R. Vegetation-dynamics-simulating responses to climate change. *Biological Reviews*, **79**, 643-670 (2004).
12. Cox, P.M. Description of the "TRIFFID" dynamic global vegetation model. *Hadley Centre Technical Note* **24** (2001).
13. Sitch, S. *et al.* Evaluation of the terrestrial carbon cycle, future plant geography and climate-carbon cycle feedbacks using five dynamic global vegetation models (DGVMs). *Global Change Biol.* **14**, 2015-2039 (2008).
14. Houghton, R. A., Revised estimates of the annual net flux of carbon to the atmosphere from changes in land use and land management 1850-2000, *Tellus Series B-Chemical and Physical Meteorology*, **55**, 378, (2003).
15. Global Forest Resource Assessment. Progress towards sustainable forest management *FAO Forestry Paper* **147**, 320pp. (2005).
16. Ramankutty, N. and Foley, J. A.: Estimating historical changes in global land cover: Croplands from 1700 to 1992, *Global Biogeochem. Cy.*, **13**, 997-1027 (1999).

17. McGuire *et al.* Carbon balance of the terrestrial biosphere in the twentieth century: Analyses of CO<sub>2</sub>, climate and land use effects with four process-based ecosystem models. *Global Biogeochemical Cycles*, **15**, 183-206 (2001)
18. Shevliakova, E. *et al.* Carbon cycling under 300 years of land use change: Importance of the secondary vegetation sink. *Global Biogeochemical Cycles*, **23**, GB2022 (2009).
19. Van Minnen, J.G., Goldewijk, K.K., Stehfest, E., Eickhout, B., van Drecht, G., and Leemans, R., The importance of three centuries of land-use change for the global and regional terrestrial carbon cycle. *Climatic Change*, DOI 10.1007/s10584-009-9596-0 (2009).
20. Piao, S. Ciais, P., Friedlingstein, P., de Noblet-Ducoudré, N., Cadule, P., and Viovy, N.. Opposing effects of land use and environmental factors in controlling the carbon balance of terrestrial ecosystems during the 20<sup>th</sup> century. *Global Biogeochemical Cycles*, in press (2009).
21. Goldewijk, K.. Estimating global land use change over the past 300 years: The HYDE database, *Global Biogeochem. Cycles*, **15**, 417– 434, doi:10.1029/1999GB001232 (2001).
22. Hurtt G. C., Frohking, S., Fearon, M. G., Moore, B., Shevliakova, E., Malyshev, S., Pacala, S. W., and Houghton, R. A.. The underpinnings of land-use history: Three centuries of global gridded land-use transitions, wood-harvest activity, and resulting secondary lands, *Global Change Biol.*, **12**, 1208–1229 (2006).
23. Houghton, R.A. Why are estimates of the terrestrial carbon balance so different? *Global Change Biology* **9**, 500-509 (2003).
24. Jain, A. K. and Yang, X., Modeling the effects of two different land cover change data sets on the carbon stocks of plants and soils in concert with CO<sub>2</sub> and climate change, *Global Biogeochem. Cycles*, **19**, GB2015, doi:10.1029/2004GB002349 (2005).
25. Ramankutty, N., H.K. Gibbs, F. Achard, R. DeFries, J.A. Foley, and R.A. Houghton. Challenges to estimating carbon emissions from tropical deforestation. *Global Change Biology* **13**:51-66 (2007).
26. Ito, A., J.E. Penner, M.J. Prather, C.P. de Campos, R.A. Houghton, T. Kato, A.K. Jain, X. Yang, G.C. Hurtt, S. Frohking, M.G. Fearon, L.P. Chini, A. Wang, and D.T. Price. Can we reconcile differences in estimates of carbon fluxes from land-use change and forestry for the 1990s? *Atmospheric Chemistry & Physics*, **8**, 3291-3310 (2008).
27. Grainger, A., Difficulties in tracking the long-term global trend in tropical forest area, *Proc. Natl. Acad. Sci. U. S. A.*, **105**, 818, doi:10.1073/pnas.0703015105 (2008).
28. DeFries, R. S., Houghton, R. A., Hansen, M. C. *et al.*, Carbon emissions from tropical deforestation and regrowth based on satellite observations for the 1980s and 1990s, *Proc. Natl. Acad. Sci. U. S. A.*, **99**, 14256, doi:10.1073/pnas.182560099 (2002).
29. Achard, F. Eva, H. D.. Mayaux, P., *et al.*, Improved estimates of net carbon emissions from land cover change in the tropics for the 1990s, *Global Biogeochemical Cycles*, **18**, doi:10.1029/2003gb002142 (2004).
30. Fearnside, P.M. Global warming and tropical land-use change: greenhouse gas emissions from biomass budning, decomposition and soils in forest conversion, shifting cultivation and secondary vegetation. *Climatic Change*, **46**, 115-118 (2000).

31. Canadell *et al.* Contributions to accelerating atmospheric CO<sub>2</sub> growth from economic activity, carbon intensity, and efficiency of natural sinks. *Proc. Nat. Acad. Sci.* doi: 10.1073/pnas.0702737104 (2007).
32. Kalnay, E. *et al.*. The NCEP/NCAR 40-Year Reanalysis Project. *Bull. Am. Meteorol. Soc.* **77**, 437–471 (1996).
33. Kanamitsu, M. *et al.*. NCEP-DEO AMIP-II Reanalysis (R-2). *Bull. of the Atmos. Met. Soc.*, **83**, 1631–1643 (2002).
34. ERA-40: ECMWF 45-year reanalysis of the global atmosphere and surface conditions 1957–2002. [ECMWF Newsletter 101](#), Summer/Autumn (2004).
35. Atlas, R., R. N. Hoffman, S. C. Bloom, J. C. Jusem, J. Ardizzone. A Multiyear global surface wind velocity data set using SSM/I wind observations, *Bull. Am. Meteorol. Soc.*, **77**, 869–882 (1996).
36. Atlas, R., R. N. Hoffman, J. Ardizzone, S. M. Leidner, and J. C. Jusem. A New Cross-Calibrated, Multi-Satellite Ocean Surface Wind Product, in *Proceedings from the International Geosciences and Remote Sensing Symposium*, IEEE publishers (2008).
37. Sabine, C. L., *et al.* The Oceanic Sink for Anthropogenic CO<sub>2</sub>. *Science*, **305**, 367–371, DOI: 10.1126/science.1097403 (2004).
38. Gurney, K.R. *et al.* Towards robust regional estimates of CO<sub>2</sub> sources and sinks using atmospheric transport models. *Nature*, **415**, 626–630 (2002).
